# Supplementary material
Source: PubMed Central journal article supplement (PMC2897413)
Supplement: supp_76_13_4130__1.pdf [file supp_76_13_4130__1.pdf]

**Table S1.** Samples of *P. japonensis* used in this study.

| Collection locality <sup>1</sup> | Collection date     | Collector                       | Accession number |             |              |
|----------------------------------|---------------------|---------------------------------|------------------|-------------|--------------|
|                                  |                     |                                 | 16S rRNA         | <i>gyrB</i> | <i>groEL</i> |
| Krume, Fukuoka                   | April, 2009         | M. Hironaka, N. Baba, H. Mukai  | AB548048         | AB548055    | AB548062     |
| Saga, Saga                       | April, 2009         | M. Hironaka, N. Baba, H. Mukai  | AB548049         | AB548056    | AB548063     |
| Kanzaki, Saga                    | March and May, 2007 | M. Hironaka, N. Baba, H. Mukai, | AB548050         | AB548057    | AB548064     |
|                                  | April, 2009         | K. Inadomi                      |                  |             |              |
| Taku, Saga                       | April, 2009         | M. Hironaka, N. Baba, H. Mukai  | AB548051         | AB548058    | AB548065     |
| Takeo, Saga                      | April, 2009         | M. Hironaka, N. Baba, H. Mukai  | AB548052         | AB548059    | AB548066     |
| Omura, Nagasaki                  | April, 2009         | M. Hironaka, N. Baba, H. Mukai  | AB548053         | AB548060    | AB548067     |
| Tatsugo, Kagoshima               | May, 2009           | S. Tojo                         | AB548054         | AB548061    | AB548068     |

<sup>1</sup>City and Prefecture. All localities are in Japan.
